# Supplementary material for: Trajectories of Lipid Profile and Risk of Carotid Atherosclerosis Progression: A Longitudinal Cohort Study
Source: MDPI journal article supplement (doi:10.3390/nu14153243), 2022-08-08
Supplement: s1 [file s1]

Supplementary Table S1. Association between CAS progression and lipid trajectory classes from baseline in participants aged  $\leq 65$  years ( $n = 8657$ )

| Baseline lipid profiles & longitudinal trajectory |                                                              | No. of Patients | CAS progression | HR (95%CI)          | <i>p</i> value |
|---------------------------------------------------|--------------------------------------------------------------|-----------------|-----------------|---------------------|----------------|
| TC                                                | TC < 5.18 mmol/L                                             | 5599            | 961             | Reference           |                |
|                                                   | TC $\geq$ 5.18 mmol/L & U-shape/inverse U-shape class        | 343             | 57              | 1.075 (0.822-1.406) | 0.599          |
|                                                   | TC $\geq$ 5.18 mmol/L& moderate-stable class                 | 2667            | 606             | 1.458 (1.317-1.615) | 0.000          |
| TG                                                | TG < 1.70 mmol/L & low-stable class                          | 5339            | 944             | Reference           |                |
|                                                   | TG < 1.70 mmol/L & moderate-stable/elevated-increasing class | 350             | 76              | 1.152 (0.912-1.456) | 0.235          |
|                                                   | TG $\geq$ 1.70 mmol/L & low-stable class                     | 605             | 109             | 1.086 (0.891-1.325) | 0.413          |
|                                                   | TG $\geq$ 1.70 mmol/L & elevated-increasing class            | 290             | 62              | 1.422 (1.100-1.839) | 0.007          |
|                                                   | TG $\geq$ 1.70 mmol/L & moderate-stable class                | 2025            | 433             | 1.247 (1.113-1.397) | 0.000          |
| LDL-C                                             | LDL-C < 3.36 mmol/L                                          | 5553            | 948             | Reference           |                |
|                                                   | LDL-C $\geq$ 3.36 mmol/L& U-shape class                      | 241             | 42              | 1.326 (0.973-1.808) | 0.074          |
|                                                   | LDL-C $\geq$ 3.36 mmol/L& inverse U-shape class              | 89              | 20              | 1.102 (0.706-1.720) | 0.669          |
|                                                   | LDL-C $\geq$ 3.36 mmol/L& stable class                       | 2726            | 614             | 1.523 (1.375-1.686) | 0.000          |
| HDL-C                                             | HDL-C $\geq$ 1.04 mmol/L & inverse U-shape class             | 286             | 63              | Reference           |                |
|                                                   | HDL-C $\geq$ 1.04 mmol/L & U-shape class                     | 1041            | 170             | 0.852 (0.638-1.137) | 0.276          |
|                                                   | HDL-C $\geq$ 1.04 mmol/L & stable class                      | 5602            | 1024            | 0.884 (0.686-1.141) | 0.344          |
|                                                   | HDL-C < 1.04 mmol/L                                          | 1680            | 367             | 1.008 (0.772-1.317) | 0.953          |

Abbreviations: CAS, carotid atherosclerosis progression; HR, hazard ratio; CI, confidence interval; TC, total cholesterol; TG, Triglyceride; LDL-C, low-density lipoprotein cholesterol; HDL-C, high-density lipoprotein cholesterol.

Supplementary Table S2. Association between CAS progression and lipid trajectory classes from baseline in participants without chronic diseases (n = 8654)

| Baseline lipid profiles & longitudinal trajectory |                                                              | No. of Patients | CAS progression | HR (95%CI)          | p value |
|---------------------------------------------------|--------------------------------------------------------------|-----------------|-----------------|---------------------|---------|
| TC                                                | TC < 5.18 mmol/L                                             | 5555            | 900             | Reference           |         |
|                                                   | TC ≥ 5.18 mmol/L & U-shape/inverse U-shape class             | 325             | 54              | 1.091 (0.828-1.438) | 0.536   |
|                                                   | TC ≥ 5.18 mmol/L& moderate-stable class                      | 2634            | 573             | 1.438 (1.295-1.598) | 0.000   |
| TG                                                | TG < 1.70 mmol/L & low-stable class                          | 5500            | 922             | Reference           |         |
|                                                   | TG < 1.70 mmol/L & moderate-stable/elevated-increasing class | 326             | 66              | 1.139 (0.887-1.462) | 0.307   |
|                                                   | TG ≥ 1.70 mmol/L & low-stable class                          | 579             | 98              | 1.029 (0.835-1.267) | 0.790   |
|                                                   | TG ≥ 1.70 mmol/L & elevated-increasing class                 | 223             | 44              | 1.342 (0.992-1.816) | 0.057   |
|                                                   | TG ≥ 1.70 mmol/L & moderate-stable class                     | 1886            | 397             | 1.248 (1.109-1.404) | 0.000   |
| LDL-C                                             | LDL-C < 3.36 mmol/L                                          | 5547            | 895             | Reference           |         |
|                                                   | LDL-C ≥ 3.36 mmol/L& U-shape class                           | 215             | 39              | 1.357 (0.984-1.871) | 0.644   |
|                                                   | LDL-C ≥ 3.36 mmol/L& inverse U-shape class                   | 92              | 19              | 1.114 (0.705-1.759) | 0.063   |
|                                                   | LDL-C ≥ 3.36 mmol/L& stable class                            | 2660            | 574             | 1.527 (1.374-1.696) | 0.000   |
| HDL-C                                             | HDL-C ≥ 1.04 mmol/L & inverse U-shape class                  | 303             | 64              | Reference           |         |
|                                                   | HDL-C ≥ 1.04 mmol/L & U-shape class                          | 1110            | 175             | 0.879 (0.660-1.170) | 0.377   |
|                                                   | HDL-C ≥ 1.04 mmol/L & stable class                           | 5552            | 971             | 0.845 (0.656-1.088) | 0.192   |
|                                                   | HDL-C < 1.04 mmol/L                                          | 1549            | 317             | 0.935 (0.715-1.224) | 0.626   |

Chronic diseases were identified as hypertension and diabetes; Abbreviations: CAS, carotid atherosclerosis progression; HR, hazard ratio; TC, total cholesterol; TG, Triglyceride; LDL-C, low-density lipoprotein cholesterol; HDL-C, high-density lipoprotein cholesterol.

Supplementary Table S3. Hazard ratios (95% confidence intervals) of CAS progression by age-stratified baseline level and trajectory class of each lipid profile.

| Baseline lipid profiles & longitudinal trajectory | <i>n</i> | CAS progression | Unadjusted                 |                | Model 1             |                | Model 2             |                |
|---------------------------------------------------|----------|-----------------|----------------------------|----------------|---------------------|----------------|---------------------|----------------|
|                                                   |          |                 | Crude HR (95%CI)           | <i>p</i> value | Adjusted HR (95%CI) | <i>p</i> value | Adjusted HR (95%CI) | <i>p</i> value |
| <b>Age ≤ 45 years</b>                             | 3681     | 493             |                            |                |                     |                |                     |                |
| TC                                                |          |                 |                            |                |                     |                |                     |                |
| Class 1: Moderate-stable                          | 3620     | 485             | Reference                  |                | Reference           |                | Reference           |                |
| Class 2: Inverse U-shape                          | 40       | 4               | 0.737 (0.275-1.974)        | 0.544          | 0.648 (0.242-1.735) | 0.388          | 0.469 (0.150-1.461) | 0.191          |
| Class 3: U-shape                                  | 21       | 4               | <b>3.027 (1.129-8.117)</b> | <b>0.028</b>   | 2.548 (0.950-6.835) | 0.063          | 2.297 (0.852-6.191) | 0.100          |
| TG                                                |          |                 |                            |                |                     |                |                     |                |
| Class 1: Low-stable                               | 2741     | 317             | Reference                  |                | Reference           |                | Reference           |                |
| Class 2: Elevated-increasing                      | 108      | 23              | <b>2.125 (1.387-3.254)</b> | <b>0.001</b>   | 1.309 (0.850-2.017) | 0.222          | 1.200 (0.770-1.870) | 0.420          |
| Class 3: Moderate-stable                          | 832      | 153             | <b>1.593 (1.313-1.932)</b> | <b>0.000</b>   | 1.090 (0.891-1.334) | 0.401          | 0.975 (0.787-1.208) | 0.816          |
| LDL-C                                             |          |                 |                            |                |                     |                |                     |                |
| Class 1: Stable                                   | 3616     | 483             | Reference                  |                | Reference           |                | Reference           |                |
| Class 2: U-shape                                  | 36       | 6               | 2.083 (0.929-4.672)        | 0.075          | 1.654 (0.738-3.711) | 0.222          | 1.552 (0.691-3.488) | 0.287          |
| Class 3: Inverse U-shape                          | 29       | 4               | 1.069 (0.399-2.861)        | 0.894          | 0.831 (0.310-2.224) | 0.712          | 0.770 (0.287-2.064) | 0.603          |
| HDL-C                                             |          |                 |                            |                |                     |                |                     |                |
| Class 1: Stable                                   | 3205     | 450             | Reference                  |                | Reference           |                | Reference           |                |
| Class 2: Inverse U-shape                          | 111      | 10              | 0.621 (0.332-1.163)        | 0.137          | 0.719 (0.384-1.346) | 0.302          | 0.708 (0.378-1.328) | 0.282          |
| Class 3: U-shape                                  | 365      | 33              | 0.708 (0.497-1.009)        | 0.056          | 0.990 (0.688-1.423) | 0.955          | 1.141 (0.783-1.662) | 0.493          |
| <b>Age 45-65 years</b>                            | 4961     | 1136            |                            |                |                     |                |                     |                |
| TC                                                |          |                 |                            |                |                     |                |                     |                |
| Class 1: Moderate-stable                          | 4646     | 1079            | Reference                  |                | Reference           |                | Reference           |                |

|                              |      |      |                            |              |                            |              |                            |              |
|------------------------------|------|------|----------------------------|--------------|----------------------------|--------------|----------------------------|--------------|
| Class 2: Inverse U-shape     | 139  | 32   | 0.781 (0.549-1.112)        | 0.170        | 0.806 (0.566-1.148)        | 0.233        | 0.829 (0.582-1.182)        | 0.300        |
| Class 3: U-shape             | 176  | 25   | <b>0.632 (0.425-0.940)</b> | <b>0.024</b> | <b>0.665 (0.446-0.989)</b> | <b>0.044</b> | <b>0.657 (0.433-0.995)</b> | <b>0.047</b> |
| TG                           |      |      |                            |              |                            |              |                            |              |
| Class 1: Low-stable          | 3229 | 741  | Reference                  |              | Reference                  |              | Reference                  |              |
| Class 2: Elevated-increasing | 198  | 42   | 1.037 (0.759-1.415)        | 0.821        | 1.007 (0.736-1.378)        | 0.965        | 1.007 (0.725-1.397)        | 0.969        |
| Class 3: Moderate-stable     | 1534 | 353  | 0.950 (0.837-1.079)        | 0.429        | 0.946 (0.833-1.076)        | 0.399        | 0.928 (0.811-1.063)        | 0.283        |
| LDL-C                        |      |      |                            |              |                            |              |                            |              |
| Class 1: Stable              | 4651 | 1075 | Reference                  |              | Reference                  |              | Reference                  |              |
| Class 2: U-shape             | 222  | 41   | 0.831 (0.608-1.135)        | 0.244        | 0.867 (0.634-1.186)        | 0.372        | 0.848 (0.612-1.175)        | 0.322        |
| Class 3: Inverse U-shape     | 88   | 20   | 0.761 (0.488-1.188)        | 0.230        | 0.790 (0.506-1.233)        | 0.299        | 0.796 (0.504-1.258)        | 0.329        |
| HDL-C                        |      |      |                            |              |                            |              |                            |              |
| Class 1: Stable              | 4105 | 946  | Reference                  |              | Reference                  |              | Reference                  |              |
| Class 2: Inverse U-shape     | 177  | 53   | 1.204 (0.913-1.588)        | 0.189        | 1.228 (0.929-1.624)        | 0.150        | 1.277 (0.961-1.696)        | 0.091        |
| Class 3: U-shape             | 679  | 137  | 0.931 (0.778-1.114)        | 0.434        | 0.960 (0.798-1.154)        | 0.662        | 0.955 (0.788-1.158)        | 0.639        |
| Age > 65 years               |      |      |                            |              |                            |              |                            |              |
| TC                           |      |      |                            |              |                            |              |                            |              |
| Class 1: Moderate-stable     | 1651 | 174  | Reference                  |              | Reference                  |              | Reference                  |              |
| Class 2: Inverse U-shape     | 43   | 4    | 0.798 (0.296-2.152)        | 0.655        | 0.762 (0.282-2.058)        | 0.591        | 0.824 (0.304-2.236)        | 0.704        |
| Class 3: U-shape             | 60   | 7    | 0.958 (0.450-2.041)        | 0.912        | 0.866 (0.406-1.849)        | 0.710        | 0.922 (0.431-1.974)        | 0.835        |
| TG                           |      |      |                            |              |                            |              |                            |              |
| Class 1: Low-stable          | 1246 | 127  | Reference                  |              | Reference                  |              | Reference                  |              |
| Class 2: Elevated-increasing | 28   | 4    | 1.964 (0.724-5.331)        | 0.185        | 1.677 (0.616-4.571)        | 0.312        | 1.806 (0.659-4.953)        | 0.251        |
| Class 3: Moderate-stable     | 480  | 54   | 1.035 (0.752-1.425)        | 0.831        | 0.946 (0.684-1.309)        | 0.739        | 1.005 (0.721-1.401)        | 0.976        |
| LDL-C                        |      |      |                            |              |                            |              |                            |              |
| Class 1: Stable              | 1642 | 172  | Reference                  |              | Reference                  |              | Reference                  |              |
| Class 2: U-shape             | 81   | 10   | 1.003 (0.529-1.899)        | 0.994        | 0.931 (0.490-1.767)        | 0.826        | 0.998 (0.524-1.899)        | 0.995        |

|                          |      |     |                            |              |                     |       |                     |       |
|--------------------------|------|-----|----------------------------|--------------|---------------------|-------|---------------------|-------|
| Class 3: Inverse U-shape | 31   | 3   | 0.595 (0.190-1.868)        | 0.374        | 0.594 (0.189-1.864) | 0.372 | 0.637 (0.202-2.005) | 0.441 |
| HDL-C                    |      |     |                            |              |                     |       |                     |       |
| Class 1: Stable          | 1421 | 148 | Reference                  |              | Reference           |       | Reference           |       |
| Class 2: Inverse U-shape | 71   | 8   | 1.129 (0.553-2.303)        | 0.739        | 1.069 (0.521-2.192) | 0.855 | 0.887 (0.387-2.031) | 0.776 |
| Class 3: U-shape         | 262  | 29  | <b>1.524 (1.017-2.284)</b> | <b>0.041</b> | 1.475 (0.976-2.229) | 0.065 | 1.480 (0.971-2.256) | 0.069 |

Bold values denote statistically significant. Model 1: Adjusted for age and male; Model 2: Adjusted for age, male, BMI, hypertension, and diabetes; Abbreviation: CAS, carotid atherosclerosis progression; HR, hazard ratio; TC, total cholesterol; TG, Triglyceride; LDL-C, low-density lipoprotein cholesterol; HDL-C, high-density lipoprotein cholesterol
